# Supplementary material for: A simple, disposable microfluidic device for rapid protein concentration and purification via direct-printing
Source: Royal Society of Chemistry journal article supplement (doi:10.1039/b802778a), 2008-01-01
Supplement: b802778a.pdf [file b802778a.pdf]

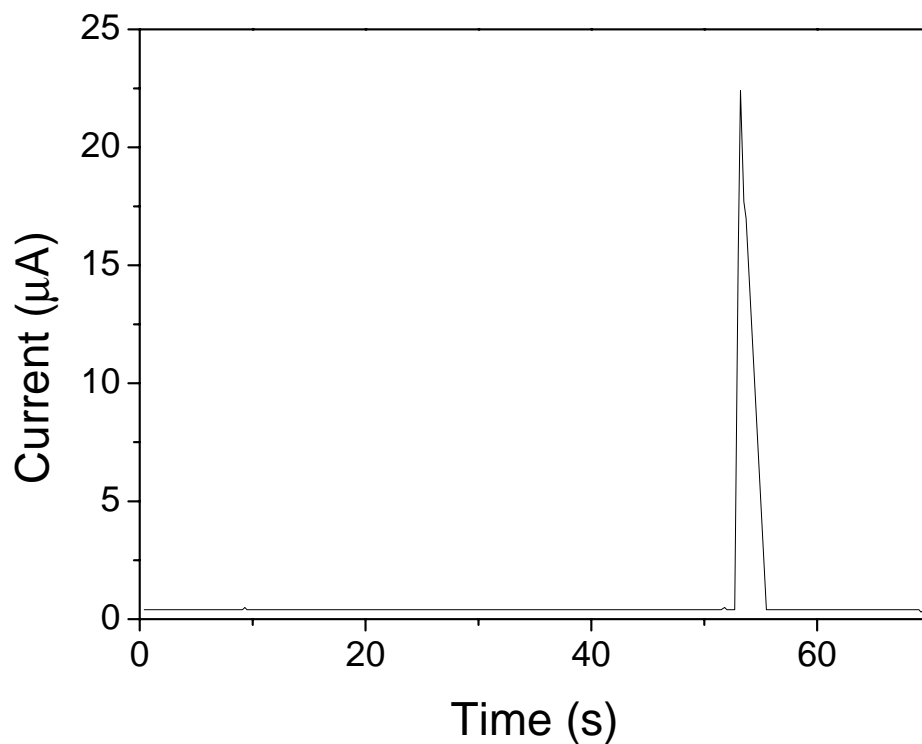

Figure S1 current transient during electric breakdown experiment in 10 mM phosphate buffer. The breakdown electric field was applied at time of 0.0 s. After ca. 53 s, the current increased rapidly indicating that a nanostructure was formed. After the appearance of the sharp increase in current, the electric field was switch off.
